# Supplementary material for: Large scale two-dimensional nanobowl array high efficiency polymer solar cell
Source: Royal Society of Chemistry journal article supplement (doi:10.1039/c2ra01258h), 2012-01-01
Supplement: c2ra01258h.pdf [file c2ra01258h.pdf]

## Supplementary information

### Large area two-dimensional nanobowl Arrays high efficiency polymer photovoltaic

Szu-Ying Chen<sup>1</sup>, Yu-Ting Yen<sup>1</sup>, Chain-Shu Hsu<sup>2</sup>, Yu-Lun Chueh<sup>1,\*</sup> and Lih-Juann Chen<sup>1,\*</sup>

<sup>1</sup>Department of Materials Science and Engineering, National Tsing Hua University, HsinChu, 30013, Taiwan, R.O.C.

<sup>2</sup>Department of Applied Chemistry, National Chiao-Tung University, 1001 University Road, Hsinchu, Taiwan 300, ROC

\* Corresponding Author: ljchen@mx.nthu.edu.tw and ylchueh@mx.nthu.edu.tw

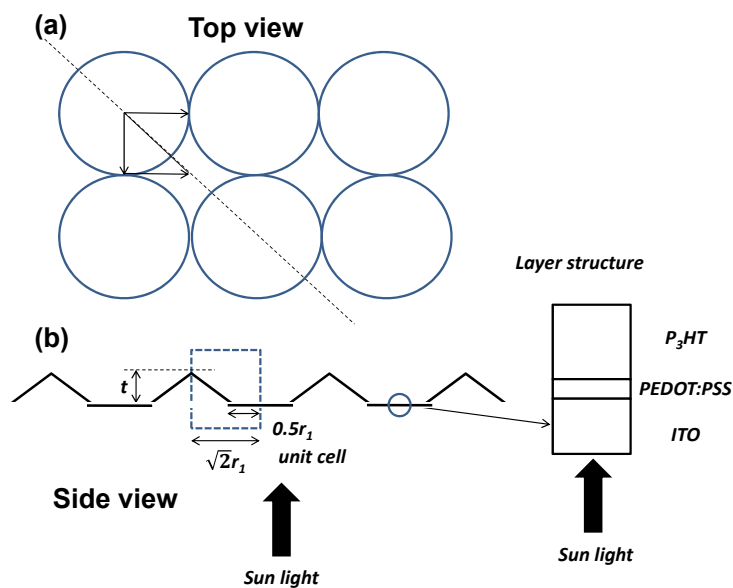

Figure S1 Schematic configuration of 2D-NBRs for simulation with (a) top and (b) side views.
